1 **Wastewater Analysis of SARS-CoV-2 as a Predictive Metric of Positivity Rate**  
2 **for a Major Metropolis**

3  
4 L.B. Stadler<sup>1,\*†</sup>, K.B. Ensor<sup>2,†,\*</sup>, J.R. Clark<sup>3</sup>, P. Kalvapalle<sup>1</sup>, Z. W. LaTurner<sup>1</sup>, L. Mojica<sup>4</sup>, A.  
5 Terwilliger<sup>3</sup>, Y. Zhuo<sup>2</sup>, P. Ali<sup>1</sup>, V. Avadhanula<sup>3</sup>, R. Bertolusso<sup>2</sup>, T. Crosby<sup>1</sup>, H. Hernandez<sup>3</sup>, M.  
6 Hollstein<sup>1</sup>, K. Weesner<sup>3</sup>, D.M. Zong<sup>1</sup>, D. Persse<sup>4,5</sup>, P.A. Piedra<sup>3</sup>, A.W. Maresso<sup>3,†,\*</sup>, L.  
7 Hopkins<sup>2,4,\*</sup>

8  
9 <sup>1</sup>Department of Civil and Environmental Engineering, Rice University, 6100 Main Street MS  
10 519, Houston, TX 77005

11 <sup>2</sup>Department of Statistics, Rice University, 6100 Main Street MS 138, Houston, TX 77005

12 <sup>3</sup>Department of Molecular Virology and Microbiology, Baylor College of Medicine, One Baylor  
13 Plaza, Houston, TX 77030

14 <sup>4</sup>Houston Health Department, 8000 N. Stadium Dr., Houston, TX 77054

15 <sup>5</sup>Departments of Emergency Medicine and Surgery, Baylor College of Medicine, One Baylor  
16 Plaza, Houston, TX 77030

17 \*Correspondence to: [lauren.stadler@rice.edu](mailto:lauren.stadler@rice.edu); [ensor@rice.edu](mailto:ensor@rice.edu); [maresso@bcm.edu](mailto:maresso@bcm.edu);  
18 [loren.hopkins@houstontx.gov](mailto:loren.hopkins@houstontx.gov)

19 †These authors contributed equally to this work.

20 **Abstract**

21 Wastewater monitoring for SARS-CoV-2 has been suggested as an epidemiological indicator of  
22 community infection dynamics and disease prevalence. We report wastewater viral RNA levels  
23 of SARS-CoV-2 in a major metropolis serving over 3.6 million people geographically spread  
24 over 39 distinct sampling sites. Viral RNA levels were followed weekly for 22 weeks, both  
25 before, during, and after a major surge in cases, and simultaneously by two independent  
26 laboratories. We found SARS-CoV-2 RNA wastewater levels were a strong predictive indicator  
27 of trends in the nasal positivity rate two-weeks in advance. Furthermore, wastewater viral RNA  
28 loads demonstrated robust tracking of positivity rate for populations served by individual  
29 treatment plants, findings which were used in real-time to make public health interventions,  
30 including deployment of testing and education strike teams.

## 31 **Introduction**

32 Wastewater monitoring for severe acute respiratory syndrome coronavirus 2 (SARS-CoV-2),  
33 the causative virus of novel pneumonia (COVID-19), represents a paradigm shift for real-time  
34 monitoring of community infection dynamics (1, 2). Although primarily considered a respiratory  
35 disease, surveillance of SARS-CoV-2 in wastewater is possible because infected individuals also  
36 excrete SARS-CoV-2 in their stool. SARS-CoV-2 RNA has been detected in the stool of ~ 40%  
37 of positive individuals (3). Diarrhea is a common symptom in those infected, and can often be a  
38 leading symptom and/or the only symptom present (4). Finally, SARS-CoV-2 efficiently  
39 replicates in an intestinal tissue model (5), raising the possibility that the intestines may also  
40 become infected by SARS-CoV-2, thereby implicating wastewater as an effective tool for  
41 disease surveillance.

42 SARS-CoV-2 RNA has been detected in numerous wastewater samples across the world (6–  
43 15). Wastewater monitoring for SARS-CoV-2 has numerous benefits as a complementary tool to  
44 diagnostic testing: it is a cost-effective means to surveil a significant portion of the US  
45 population served by public sewer systems; it could identify outbreaks earlier than diagnostic  
46 testing (6, 7, 16); it does not require individuals to opt-in to participate and thus may capture the  
47 substantial undocumented infections and spread of the virus (17); it captures both symptomatic  
48 and asymptomatic infections of SARS-CoV-2 (18, 19); it could be applied in resource-poor  
49 communities with limited access to healthcare facilities; and it may be used to determine novel  
50 associations between viral transmission, clinical burden, and population demographics. While  
51 there is interest in implementing wastewater monitoring on a national scale as a lead-indicator  
52 for SARS-CoV-2 infections and disease prevalence, the relationship between viral signal and key  
53 community metrics such as the positivity rate (which has been used to make policy decisions) is

54 poorly characterized. Furthermore, the impact of assessing viral RNA levels with enhanced  
55 spatial resolution (i.e., unique geographic sites within a large area) as an indicator of disease  
56 prevalence or outbreaks is not known.

57 Here, we conducted an extensive wastewater monitoring program for SARS-CoV-2 for a city  
58 of 3.6M people (Houston, Texas) that underwent a massive surge in cases, hospitalization, and  
59 deaths over a 22-week period from May to October of 2020. By collecting samples from 39  
60 wastewater treatment plants (WWTPs) across Houston that treat a combined average flow of 250  
61 million gallons of wastewater per day, we demonstrate with nonparametric regression models  
62 that changes in SARS-CoV-2 RNA levels in wastewater provide a two-week lead-indicator for  
63 changes in positivity rate. The 39 WWTPs sampled range in size from 0.11 to 80 million gallons  
64 per day (MGD), corresponding to service population sizes of approximately 5,100 to 564,000,  
65 thus providing an array of population sizes by which to compare datasets and results. In addition,  
66 this geographic resolution in sampling was used to identify regional hotspots which allowed  
67 public health officials to mobilize strike teams to increase testing, education, and contact tracing  
68 in soon-to-be affected areas.

## 69 **Results and Discussion**

### 70 ***SARS-CoV-2 viral RNA loads correlate with clinical positivity rates***

71 Between May 11 and October 10, 2020 we collected and analyzed 24-hour time-weighted  
72 composite influent samples from between 16 and 39 wastewater treatment plants (WWTPs)  
73 (Table S1) once per week that collectively serve over 3.6M people in Houston (**Fig. 1A**).  
74 Samples were collected from all sites on the same day each week (Tuesday mornings,  
75 corresponding to a 24 hour composite that ran from 7am Monday to 7am Tuesday). To increase

76 the rigor and reproducibility of the analysis, SARS-CoV-2 RNA was quantified from influent  
77 wastewater samples in two independent laboratories: Baylor College of Medicine and Rice  
78 University. Viral loads for each WWTP were calculated by multiplying the measured virus RNA  
79 concentration by the 24-hour average flow rate for the corresponding WWTP. We applied a  
80 multi-level flexible model that took into account quantification of SARS-CoV-2 RNA using two  
81 primer sets (N1 and N2, the same primer sets used by the CDC 2019-nCoV RT-PCR diagnostic  
82 test), results reported by two different laboratories, and concentration replicates analyzed at each  
83 laboratory. Nonparametric regressions were fit to weekly average viral load data for each  
84 individual site and to the aggregate viral load (**Fig. 1B**). **Figure 1B** includes only the 16 WWTPs  
85 that were sampled between May 11 and October 5. Additional plots including all sites are  
86 provided in **Fig. S2** and **S3**.

87 Houston underwent a major surge in cases, hospitalizations, and deaths that began in the first  
88 week of June, peaked in late July, and has trended downward since then (**Fig. 1C** shows the  
89 positivity rate as an example). At one point, the city averaged more than 1,500 daily cases,  
90 representing one of highest rates of daily case growth in a metropolitan area in the U.S. In the  
91 beginning stages of sampling prior to the clinical surge, more than half the sites sampled (16  
92 total at this point) were positive for SARS-CoV-2. Although unaware of the fact at the time,  
93 between May 11 and 18, we recorded the second highest levels of viral load behind only the peak  
94 viral load detected during the surge at the end of June/early July. Following May 25, a stark drop  
95 in the mean viral load was observed across all sites. However, in early June, the case number  
96 began to increase rapidly, which, incidentally, was preceded by a concomitant rise in viral RNA  
97 levels in the wastewater, that peaked in late June.

98 The wastewater viral load tracked the positivity rate (based on specimen date) for the 16  
99 WWTPs that have been analyzed since May 11 and serve a total population of 2.7M (**Fig. 1C**;  
100 Spearman  $r = 0.84$ , the correlation was performed at the weekly level between the wastewater  
101 and positivity rate splines). Wastewater viral load and positivity rate data were smoothed using  
102 nonparametric regressions to significantly improve the strength of the correlation between the  
103 datasets. SARS-CoV-2 RNA wastewater loads are subject to variability for numerous reasons,  
104 including the characteristics of the infected individuals contributing virus to wastewater in their  
105 stool, variability in wastewater flows, autosampler aliquots that comprise the composite sample,  
106 and variability in processing methods used to concentrate, extract, and quantify the viral RNA.  
107 Similarly, positivity rate data are susceptible to variability in the number of individuals tested  
108 each day. Smoothing effectively de-noised the two imperfect and highly variable datasets.

109 A cross-correlation analysis was used to assess whether a time displacement of one dataset  
110 relative to the other impacts the strength of the correlation between the two. We observed a  
111 strong cross-correlation up to fourteen days (Spearman  $r > 0.8$  for smoothed datasets and  $r > 0.6$   
112 for raw datasets), suggesting that detection of SARS-CoV-2 RNA in wastewater could serve as a  
113 leading indicator of the positivity rate for community recorded infections. Previous studies have  
114 reported the detection of SARS-CoV-2 RNA in influent wastewater prior to known clinical cases  
115 in sewersheds (6, 7, 20, 21). Peccia et al. measured SARS-CoV-2 RNA in primary settled solids  
116 and found that concentrations of SARS-CoV-2 RNA in the solids were 0-2d ahead of SARS-  
117 CoV-2 positive test results (by date of specimen collection) (16). Many WWTPs do not have  
118 primary treatment, including all of the WWTPs in Houston, TX. In addition, for cities with large  
119 centralized systems, community-level monitoring will require sample collection from sewer  
120 lines. Thus, these approaches will require measuring virus from untreated wastewater, where

121 viral concentrations are typically present at lower concentrations than in primary solids (22). Our  
122 findings show significant associations between influent wastewater concentrations and positivity  
123 rates and suggest that influent SARS-CoV-2 RNA concentrations may lead positivity rates by 7  
124 to 14 days in such samples.

125 Total viral load for each WWTP was plotted against the total clinical positive cases for the  
126 corresponding service area for the entire study period (**Fig. 1D**). Combining all 39 sites sampled  
127 over the entire 22-week study period revealed a strong relationship between the wastewater viral  
128 load and positive cases (Spearman  $r = 0.92$ ). This provides compelling evidence that wastewater  
129 monitoring of SARS-CoV-2 RNA could be used to estimate COVID-19 disease prevalence in  
130 communities, in addition to a tool for trend tracking. There is considerable uncertainty in  
131 converting instantaneous wastewater viral loads of SARS-CoV-2 RNA to number of infected  
132 people due to variability in RNA excretion rates between individuals and over time. Our results  
133 indicate that this conversion may be possible as has been shown with polio (23), as better  
134 estimates of population-level fecal shedding rates of SARS-CoV-2 are established, and losses of  
135 SARS-CoV-2 RNA during sewer transport and during sample processing are quantified.

136 ***Correlation between wastewater viral loads and positivity rates was robust for individual***  
137 ***WWTPs***

138 We assessed the correlation between wastewater viral RNA levels and positivity rates for  
139 each individual WWTP sampled. For the 16 WWTPs of which sampling began on May 11, we  
140 observed significant correlations between wastewater viral loads and positivity rates (Spearman  $r$   
141 = 0.49 – 0.96 for smoothed datasets, 0.45 – 0.89 for raw datasets; **Fig. 2**). There was no  
142 relationship between the strength of the correlation between the wastewater viral load and  
143 positivity rate regressions and WWTP flow rates, service populations, or geographic areas

144 served. For the additional WWTPs that have been sampled since July 8, 2020, we largely  
145 observed that wastewater viral loads tracked positivity rates (Spearman  $r = 0.52 - 1.0$  for  
146 smoothed datasets,  $0.08 - 0.86$  for raw datasets; **Fig S3**), where there was sufficient clinical  
147 testing data available to compare to the wastewater data. In many of the sewersheds, there was  
148 insufficient clinical testing performed to estimate a positivity rate (here, positivity rates were  
149 only calculated if at least four diagnostic tests per week were performed in the sewershed service  
150 population). Thus, the lack of correlation may be due more to the lack of robust nasal testing  
151 rather than signal of virus from the wastewater. The largest WWTP sampled, the 69<sup>th</sup> Street  
152 WWTP, is representative of a typical centralized WWTP that serves a large, urban area, whereas  
153 the smallest WWTP sampled is similar in size to the thousands of WWTPs that serve smaller,  
154 rural and suburban communities. Of note, strong correlations were continuously observed as  
155 wastewater viral levels and the positivity rate continued to decline.

### 156 *Predictive models forecast positivity rate from wastewater viral load*

157 The strong leading relationship of wastewater viral loads and clinical positivity rate provides  
158 the basis for a predictive model of positivity rate from observed wastewater viral load. We  
159 considered two models to predict the smoothed daily positivity rate. The first model uses the  
160 current, one- and two-week prior data of the average observed wastewater viral load (in copies  
161 day<sup>-1</sup>). The second model uses only one- and two- week prior data to provide a true one-week  
162 predictive model. Wastewater viral loads were log<sub>10</sub> transformed before fitting. Each model  
163 accounts for the WWTP and the temporal structure of the data. The in-sample Spearman  
164 correlation between observed and predicted positivity rate is 0.83 for model 1 and 0.79 for model  
165 2 (**Fig. 3A**). Using the nonparametric estimate of wastewater viral load as input, the predictive  
166 models were used to generate estimated positivity rates and evaluated against the smoothed



167 positivity rate (**Fig. 3B** and **Fig. S4** show the time series plots for the model estimates overlaid  
168 on the positivity rate for individual WWTPs).

169 Given the strong predictive relationship of wastewater viral loads and positivity rates,  
170 wastewater monitoring represents a viable approach to test the entire population of Houston  
171 simultaneously and a means to provide continuous, weekly monitoring of the entire population.  
172 This is particularly critical if diagnostic testing rates decline. In 12 of the 39 sewersheds  
173 monitored, there was at least one occurrence of when less than 0.1% of the sewershed's  
174 population was nasal tested over a 7-day period during our study period. These 12 sewersheds  
175 serve a total population of 613,000, approximately 15% of the total population of Houston. In  
176 these sewersheds, wastewater monitoring represented the primary means of assessing the  
177 magnitude of disease impact in the community. For example, when applied to the sewershed  
178 MUD#203 (**Fig. 3B**) the predictive model could be used to estimate positivity rate during periods  
179 when clinical testing data was sparse. This approach illustrates the power of using wastewater  
180 viral load to forecast positivity rates in communities. While the models shown here are specific  
181 to the Houston system, this model structure could be applied to other cities to forecast positivity  
182 rates based on measured viral loads.

### 183 ***Rate of change of viral levels identifies outbreaks for public health action***

184 Time-series geospatial analysis of population normalized wastewater viral loads can be used  
185 to identify locations experiencing high infection burden each week (**Fig. 4A** and **Fig. S5**). To  
186 identify specific areas that are experiencing rapid community spread of the virus, we can  
187 visualize the change in the wastewater viral load from week to week. Assessment of the rate of  
188 change allows one to determine how an outbreak is accelerating with time, a critical metric when  
189 considering the efficient application or exhaustion of intervention or healthcare resources. When

190 the time-series for the entire survey period is transformed into a heat map for all 39 sites, clear  
191 week to week acceleration and deceleration of viral levels are observed (**Fig. 4B**). Remarkably,  
192 every site across the entire city, albeit 1, showed a net increase in viral levels during the June 29  
193 to July 6 week interval (**Fig. 4B**, red band on heat map). It is noteworthy that the total number of  
194 hospitalizations in Houston peaked the week of July 14 – 21, indicating that the significant  
195 acceleration of viral levels during early July as indicated by wastewater analysis likely drove the  
196 major clinical surge Houston experienced later in the month. Furthermore, the rate of change in  
197 viral levels provides critical information for healthcare officials because it pinpoints areas where  
198 infections are most rapidly worsening or improving. For example, between September 7<sup>th</sup> and  
199 14<sup>th</sup>, while the viral load across the city appeared to plateau (**Fig. 1B**), there were areas that  
200 experienced significant increases and areas with significant decreases in viral load (**Fig. 4B**). In  
201 this specific week, the areas with significant increases in viral loads, indicative of community  
202 spread, were distributed across the city. This reflects the reality that disease burden is heavily  
203 influenced by local outbreaks that can be heterogeneously distributed across the city.

204 The wastewater data was used to inform Health Department interventions. The WWTP that  
205 serves each city zip code, or the majority of the zip code, was identified. The WWTP virus load  
206 and the one week trend data for the corresponding zip codes, along with zip code level clinical  
207 positivity rate, were evaluated by a committee of Houston Health Department public health  
208 professionals, including the directors of the Office of Planning Evaluation and Research for  
209 Effectiveness, Office of Chronic Disease, Health Education and Wellness, and the Public Health  
210 Preparedness, Disease Prevention and Control Division. The committee uses the data to identify  
211 the 15 highest priority zip codes for public health intervention and then deploys strike teams to  
212 provide education and increased free clinical testing in these zip codes. Between August 15 and

213 September 15, 2020 targeted intervention in these zip codes resulted in educating 74,000  
214 individuals. In light of a recent decreasing trend in clinical test penetration, wastewater data are  
215 becoming increasingly more important for virus surveillance.

216 Wastewater monitoring represents a rapid, inexpensive approach to obtain comprehensive  
217 coverage of large populations. Here, longitudinal sampling over 147 days of 39 wastewater  
218 treatment plants that vary in flow, population served, and geographic service area led to the  
219 discovery of significant correlations between SARS-CoV-2 RNA levels in wastewater and  
220 positivity rates across numerous zip code areas captured by the WWTPs. Based on the strength  
221 of the correlation, we show that wastewater viral loads can be used to predict positivity rates  
222 two-weeks in advance. Furthermore, granular detection of SARS-CoV-2 in sewersheds can be  
223 used to identify local outbreaks which here allowed prioritization in real-time of the allocation of  
224 healthcare resources, including free diagnostic testing and education. Additional research is  
225 needed to estimate disease prevalence from wastewater. This includes knowledge of SARS-CoV-  
226 2 RNA titers in stool of symptomatic and asymptomatic people, a quantitative characterization of  
227 losses of viral RNA during sewer transport due to dilution, adsorption, and degradation and the  
228 development of systematic approaches for selecting monitoring locations based on the above  
229 parameters. We propose the approaches developed here can be used to develop a regional,  
230 national, and/or global wastewater surveillance program for SARS-CoV-2 with similar success  
231 as observed for Houston and that might also translate to other respiratory or gastrointestinal  
232 viruses. After a vaccine is developed and administered, wastewater monitoring can facilitate  
233 early detection of re-emergence of SARS-CoV-2 in communities and be used to direct resources  
234 for vaccine administration, in line with previous work performed in the 1960s that facilitated the  
235 accelerated delivery of the oral polio vaccine to prevent outbreaks.

## 236 **Materials and Methods**

### 237 Sample collection and wastewater treatment plant (WWTP) flow data

238 Samples were collected from 39 different WWTPs within Houston. The WWTPs cover a  
239 total service area of approximately 580 square miles. Information for each WWTP including  
240 average flow rate, sewershed area, and service population are provided in **Table S1**. Employees  
241 of Houston Water first collected samples from refrigerated, 24-hour time-weighted, composite  
242 samplers that drew directly from the influent channels at each WWTP. Average influent flow  
243 rates over the 24-hour collection period were provided by Houston Water for each facility  
244 sampled.

245 After collection from each WWTP site, samples were transported to Houston Water's central  
246 laboratory facility on ice, aliquoted into bottles, immediately placed back on ice, and then  
247 transported to laboratories at Baylor College of Medicine (BCM) and Rice University (Rice) for  
248 analysis. In both laboratories, samples were stored at 4 °C prior to analysis for no longer than 36  
249 hours. SARS-CoV-2 RNA quantification methods were developed based on previous studies  
250 (24–27). Methods differed between BCM and Rice laboratories, and evolved within our  
251 individual laboratories over the course of the study period, as detailed below.

### 252 Virus concentration

253 *BCM concentration methods.* Between May 11 and June 29, 2020, SARS-CoV-2 in wastewater  
254 samples was concentrated using a PEG precipitation method in the BCM laboratory. Wastewater  
255 samples were aliquoted into 200 mL triplicates then centrifuged at 7,140 g for 15 minutes at 4 °C  
256 in 500 mL polypropylene bottles to remove sludge and large debris. Supernatants were passed  
257 through 0.22 µm filters (SCGPS05RE, MilliporeSigma), transferred to clean polypropylene

258 bottles, and precipitated with PEG (8% w/v, 16 g) and NaCl (0.5 M, 5.844 g) overnight at 4 °C.  
259 Precipitated filtrates were then centrifuged at 16,900 g for 30 minutes at 4 °C, supernatants  
260 poured off, and pellets resuspended in 2 mL 1X PBS solution.

261 On July 6, Baylor College of Medicine (BCM) switched to concentrating SARS-CoV-2 in  
262 wastewater samples using an electronegative filtration method. We aliquoted wastewater  
263 samples into 40 mL triplicates then gently centrifuged at 3,000 g for 1 minute in 50 mL conical  
264 tubes to remove sludge and large debris. A 6-head (EZFITMVHE3, MilliporeSigma) EZ Fit  
265 Manifold (EZFITBASE6, MilliporeSigma) was employed to pull 25 mM MgCl<sub>2</sub> supplemented,  
266 25 mL samples through 0.45 µm pore size, electronegative microbiological analysis HA filters  
267 contained within EZ Fit Filtration Units (EFHAW100B, MilliporeSigma) to bind RNA/virus.  
268 The funnel was then disassembled and the filter flipped over. The funnel was reassembled with  
269 the inverted filter, and positive pressure applied to elute virus components off the filter with 5  
270 mL of 1 mM NaOH. 2.5 mL of eluent was collected in a 15 mL conical tube and neutralized  
271 with 12 µL of 100 mM H<sub>2</sub>SO<sub>4</sub>.

272 *Rice electronegative filtration concentration.* Between June 22 and August 17, 2020, SARS-  
273 CoV-2 in wastewater samples was concentrated using an electronegative filtration method.  
274 Wastewater (50 mL) was aliquoted into a 6-head, Multi-Vac 610-MS Manifold (180310-01,  
275 Sterlitech) containing a pre-DI-washed 0.45 µm pore size, electronegative microbiological  
276 analysis HA filter (HAWG047S6, MilliporeSigma). On August 24th, we switched to  
277 centrifuging the influent samples to remove solids prior to filtration. This change was  
278 implemented because it reduced filtration time and did not significantly impact the measured  
279 concentrations of N1 and N2 in samples (data not shown). Influent wastewater samples were  
280 centrifuged for 10 minutes at 4,100 g and 4 °C. Subsequently, 50 mL of supernatant was poured

281 into the vacuum manifold followed by the addition of  $MgCl_2 \cdot 6H_2O$  to achieve a final  
282 concentration of 25 mM. The samples were gently swirled with a pipette tip to homogenize and  
283 allowed to sit for five minutes. A vacuum pump then pulled the sample through the filter. After  
284 filtration was complete, the filter was folded and placed into a bead tube containing 0.1 mm glass  
285 beads. Bead tubes containing filters were stored at  $-80\text{ }^{\circ}C$  and allowed to freeze prior to bead  
286 beating and nucleic acid extraction.

### 287 Nucleic acid extraction

288 *BCM nucleic acid extraction.* Between May 5 and June 12, 2020, viral RNA from wastewater  
289 eluates and precipitates was extracted using the QIAamp Viral Mini RNA Kit (52906, Qiagen)  
290 with the QIAcube Connect (9002864, Qiagen) automated platform, according to manufacturer  
291 instructions. 140  $\mu$ l of wastewater was extracted and eluted with 100  $\mu$ l of elution buffer (May 5  
292 – May 15). For “enhanced extraction” 280  $\mu$ l of wastewater was extracted and eluted to 50  $\mu$ l of  
293 elution buffer (May 19 – June 12). After June 12, 2020 viral RNA was extracted  
294 using chemagic Viral DNA/RNA 300 Kit special H96 (CMG-1033-S, Perkin Elmer) with the  
295 chemagic 360 (2024-0020, Perkin Elmer) automated platform. 300  $\mu$ l of each sample was  
296 extracted according to manufacturer instructions and eluted in 100  $\mu$ l sterile, nuclease-free water.  
297 All extracts were stored at  $-80\text{ }^{\circ}C$  until quantification.

298 *Rice nucleic acid extraction.* Between June 22 and August 17, 2020, viral RNA was extracted  
299 using the AllPrep PowerViral DNA/RNA Kit (28000-50, Qiagen) with minimal modifications to  
300 manufacturer instructions. Immediately prior to bead beating, bead tubes containing the frozen  
301 filters were removed from the freezer and transferred to ice. 7  $\mu$ L of  $\beta$ -Mercaptoethanol and 693  
302  $\mu$ L of PM1 solution were added to each bead tube. Sample tubes were bead beaten at max speed  
303 in a Mini-Beadbeater 24 (3,500 rpm; 112011, BioSpec) for 1 minute, returned to ice for 2

304 minutes, bead beaten for 1 minute, and then returned to ice. After bead beating, tubes were  
305 centrifuged at 17,000 g for 2 minutes to pellet the filter debris and beads. Approximately 450  $\mu$ L  
306 of sample lysate from the bead beating tube was transferred into a rotor adapter for extraction  
307 using the QIAcube Connect (9002864, Qiagen) automated platform. Each sample was eluted in  
308 50  $\mu$ L nuclease-free water. All extracts were stored at -20 °C until quantification.

309 On August 24, the Rice laboratory switched to using the Maxwell 48 RSC automated  
310 platform (AS8500, Promega) for nucleic acid extractions. This decision to change extraction kits  
311 was based on a supply chain shortage of Qiagen AllPrep PowerViral kits. A head-to-head  
312 comparison of the Qiagen AllPrep PowerViral kit and Maxwell RSC PureFood GMO and  
313 Authentication Kit (AS1600, Promega) was performed by comparing N1 and N2 yields from 22  
314 wastewater samples. We consistently observed significantly higher yields of SARS-CoV-2 RNA  
315 using the PureFood GMO kits (data not shown).

316 A modified protocol for the Maxwell RSC PureFood GMO kit, as recommended by Promega  
317 representatives, was used to extract samples on the Maxwell RSC 48. Bead tubes containing  
318 0.1mm glass beads and sample filters were supplemented with 700  $\mu$ L of CTAB. Sample tubes  
319 were bead beaten at max speed in a Mini-Beadbeater 24 (3,500 rpm; 112011, BioSpec) for 1  
320 minute, returned to ice for 2 minutes, bead beaten for 1 minute, and then returned to ice. After  
321 bead beating, samples tubes were administered 40  $\mu$ L of Proteinase K and then briefly vortexed  
322 to mix. Sample tubes were then incubated at 56 °C for 10 minutes followed by centrifugation for  
323 2 minutes at 17,000 g. After centrifugation, 350  $\mu$ L of supernatant was added to the first well of  
324 the Maxwell cartridge along with 300  $\mu$ L of Lysis Buffer. The Maxwell RSC 48 completed the  
325 extraction and eluted the sample into 50  $\mu$ L of elution buffer. Extracts were stored at -20 °C until  
326 quantification.

327 Quantification of SARS-CoV-2 RNA

328 *BCM quantification of SARS-CoV-2 RNA.* The extracted RNA was tested using the CDC 2019-  
329 Novel coronavirus (2019-nCoV) Real-Time RT-PCR Diagnostic panel (28). The assay targets the  
330 nucleocapsid (N) gene (N1 and N2) of the SARS-CoV-2 genome. Real-time RT-PCR was  
331 performed using 10  $\mu$ l of eluted RNA and 15  $\mu$ l of TaqPath 1-step RT-PCR Master Mix, CG  
332 (A15299 Applied Biosystems) under the following cycling conditions: 25 °C for 2 minutes, 50  
333 °C for 15 minutes, 95 °C for 2 minutes, and 45 cycles of 95 °C for 3 seconds, 55 °C for 30  
334 seconds on a 7500 Fast Dx Real-Time PCR Instrument (4406985, Applied Biosystems) with  
335 SDS version 1.4 software. Samples were considered positive if N1, N2, Ct values were <40. The  
336 real-time RT-PCR included negative extraction, no template negative controls, and a standard  
337 curve of the linearized N plasmid to determine the genomic copy numbers of N1 and N2 in the  
338 samples. The standard curve ranged from 10,000-16 copies/mL with N1 primer values of  $R^2$ :  
339 0.992, efficiency: 99.1% and N2 primer values of  $R^2$ : 0.969, efficiency: 97.4%. Limit of  
340 detection (LOD) was set as 2 gene copies/10 $\mu$ l RNA template. Applying a concentration factor  
341 of 30x from wastewater to RNA extract, and converting from  $\mu$ L to L, the LOD was calculated  
342 as 6,667 copies/L wastewater.

343 *Rice quantification of SARS-CoV-2 RNA via RT-ddPCR.* RNA extracts stored at -20 °C were  
344 thawed on ice, centrifuged at 17,000 g for 5 minutes to remove residual magnetic beads (if the  
345 Maxwell extraction platform was used, otherwise centrifugation is skipped), and supernatants  
346 were aliquoted into a 96 well plate. Reverse transcription and droplet digital PCR (ddPCR) were  
347 conducted with One-Step RT-ddPCR Advanced Kit for Probes (1864021, Bio-Rad) on the  
348 QX200 AutoDG Droplet Digital PCR System (1864100, Bio-Rad) to quantify the concentration  
349 of N1 and N2 SARS-CoV-2 gene targets in extracted samples. Limit of detection (LOD) was



350 determined as 3 positive droplets per reaction well of ddPCR, which is equivalent to  
351 approximately 0.33 gene copies/ $\mu\text{L}$  RNA template. Applying a concentration factor of 1,000x  
352 from wastewater to RNA eluate (50mL wastewater is concentrated to generate a 50 $\mu\text{L}$  RNA  
353 extract), and converting from  $\mu\text{L}$  to L, the LOD was calculated as 330 copies/L wastewater.

354 The reaction composition followed the manufacturer recommendations. Each 22  $\mu\text{L}$  duplex  
355 reaction contained 0.12  $\mu\text{L}$  DNA-grade water, 5.5  $\mu\text{L}$  Supermix, 2.2 uL reverse transcriptase, 1.1  
356  $\mu\text{L}$  DTT (15 mM), 0.55  $\mu\text{L}$  N1 probe (0.25  $\mu\text{M}$ ), 0.5  $\mu\text{L}$  N1 forward primer (0.9  $\mu\text{M}$ ), 0.5  $\mu\text{L}$  N1  
357 reverse primer (0.9  $\mu\text{M}$ ), 0.55  $\mu\text{L}$  N2 probe (0.25  $\mu\text{M}$ ), 0.5  $\mu\text{L}$  N2 forward primer (0.9  $\mu\text{M}$ ), 0.5  
358  $\mu\text{L}$  N2 reverse primer (0.9  $\mu\text{M}$ ), and 10  $\mu\text{L}$  of RNA template (100 fg – 100 ng). The N1 and N2  
359 sequences used here for primers and probes were taken from the recommended CDC sequences  
360 (**Table S2**). Primers and probes were purchased from Genewiz and Applied Biosystems. The  
361 RNA templates and the ddPCR plates were maintained on ice throughout the procedure. After  
362 droplet generation, thermocycling was conducted on a C1000 Touch Thermocycler (1851196,  
363 Bio-Rad). Thermocycling consisted of reverse transcription at 50 °C for 60 minutes, enzyme  
364 activation at 95 °C for 10 minutes, followed by 40 cycles of denaturation at 95 °C for 30 seconds  
365 and annealing/extension at 60 °C for 1 minute (2 °C/sec ramp rate), and completed with enzyme  
366 deactivation at 98 °C for 10 minutes. Samples were then held at 4 °C in the thermocycler for no  
367 more than 12 hours until droplet reading. Droplets were analyzed using automatic settings on the  
368 QuantaSoft v1.7.4 software, and manual thresholding was performed when automatic settings  
369 failed to detect clusters of positive and negative droplets.

370 *Rice quantification of SARS-CoV-2 RNA via RT-qPCR.* One step reverse transcription and  
371 quantification was performed using TaqMan Fast Virus 1-Step Master Mix (4444434, Applied  
372 Biosystems). Each 10  $\mu\text{L}$  duplex reaction contained 2.7  $\mu\text{L}$  DNA-grade water, 2.5  $\mu\text{L}$  master

373 mix, 0.2  $\mu$ L N1 probe (0.2  $\mu$ M), 0.1  $\mu$ L N1 forward primer (0.4  $\mu$ M), 0.1  $\mu$ L N1 reverse primer  
374 (0.4  $\mu$ M), 0.2  $\mu$ L N2 probe (0.2  $\mu$ M), 0.1  $\mu$ L N2 forward primer (0.4  $\mu$ M), 0.1  $\mu$ L N2 reverse  
375 primer (0.4  $\mu$ M), and 4 0.2  $\mu$ L N1 probe (0.2  $\mu$ M), 0.1  $\mu$ L N1 forward primer (0.4  $\mu$ M), 0.1  $\mu$ L  
376 N1 reverse primer (0.4  $\mu$ M), and 4  $\mu$ L RNA template assembled in Fast 96-well plates (Applied  
377 Biosystems). The N1 and N2 sequences used here for primers and probes were taken from the  
378 recommended CDC sequences (**Table S2**). Primers and probes were equivalent to those used in  
379 our RT-ddPCR. Thermocycling was completed in a QuantStudio 3 Real Time PCR System  
380 (A28567, Applied Biosystems) and consisted of reverse transcription at 50 °C for 5 minutes,  
381 enzyme activation at 95 °C for 20 seconds, and 40 cycles of denaturation at 95 °C for 3 seconds  
382 and annealing/extension at 60 °C for 30 seconds. Automatic background correction and  
383 thresholding were performed in QuantStudio Design and Analysis software (version 1.4). Linear  
384 DNA fragments of 250 bp each for N1 and N2 (Genewiz) were diluted in Herring Sperm DNA  
385 solution (D1811, Promega) and used as standards in a 10-fold dilution series of 5 concentrations  
386 from 28,000 copies/well to 2.8 copies/well in two replicates on every qPCR plate.

### 387 RT-qPCR versus ddPCR quantification of SARS-CoV-2 RNA in influent wastewater samples

388 The Rice laboratory compared assays using RT-qPCR versus ddPCR for quantifying N1 and N2  
389 targets in wastewater samples. To confirm that results generated between ddPCR and RT-qPCR  
390 corresponded, Rice directly compared concentrations of the same extracts as quantified by the  
391 two different methods. We found a relatively linear relationship (N1 -  $R^2 = 0.80$ , N2 -  $R^2 = 0.91$ ),  
392 where RT-qPCR measurements were roughly 0.07 times and 0.31 times that of ddPCR for N1  
393 and N2, respectively (**Fig. S1**). These results indicate that measurements from the two methods  
394 can be directly compared when an appropriate adjustment factor is applied. We also compared  
395 N1 to N2 concentrations as measured by the two methods. We found a linear relationship

396 (ddPCR -  $R_2 = 0.92$ , RT-qPCR = 0.93) where N2 measurements were about 0.7 times and 3.05  
397 times N1 for ddPCR and RT-qPCR, respectively. Differences between ddPCR and qPCR, as  
398 well as N1 and N2 may be caused by differences in primer/probe binding efficiency between N1  
399 and N2, biases introduced by standards in RT-qPCR, and/or differences in sensitivity of the  
400 different channels in ddPCR to detect their fluorophore of interest.

#### 401 Clinical positivity rate data

402 Per Governor's Executive Order No. GA-10, all public and private entities conducting FDA-  
403 approved SARS-CoV-2 diagnostic tests are required to report all test results, including both  
404 positive and negative results, to the City of Houston Health Department (HHD). Currently, HHD  
405 utilizes the Houston Electronic Disease Surveillance System (HEDSS) to receive and store  
406 COVID-19 test results to perform daily surveillance and contact tracing activities for the City.  
407 There are multiple input methods of COVID-19 data into HEDSS from over 100 reporting  
408 entities across the U.S., including direct electronic laboratory records (ELRs), feed from several  
409 local hospitals/laboratories, batch uploads of file transfers received through SFTP sites, manual  
410 data entry of faxes, and ELRs from the Texas Department of State Health Services. A separate  
411 team audits data in HEDSS to determine if all test results for the City are reported to HHD in a  
412 timely manner. The lab audit team independently contacts and requests a separate data file of all  
413 COVID-19 results to compare with data currently in HEDSS from entities participating in the lab  
414 audit project. In addition, this team evaluates the completeness and quality of the required data  
415 fields received from the entity (e.g., percentage of results with race/ethnicity information or  
416 percentage of records with realistic specimen dates).

417 For WWTP activities, COVID-19 results are extracted from HEDSS and geocoded to  
418 wastewater treatment plant service area (WWTP) so that each test result has a corresponding

419 WWTP (if within the city limits and can be geocoded). Daily counts of people tested for  
420 COVID-19 and people who have tested positive for COVID-19 are determined for each WWTP.  
421 This frequency data is used to calculate the positivity rate by WWTP service area.

#### 422 Data cleaning and early processing

423 Electronic data was updated weekly. It consisted of wastewater analysis results (N1 and N2  
424 copies/L of wastewater) from BCM and Rice, and population and flow rate information from the  
425 City of Houston. In all cases, the information was at the WWTP level. The format of the files  
426 was comma separated files (CSV). The data was imported into R programming language through  
427 the RStudio Integrated Development Environment (IDE). Several steps were performed to make  
428 sure that naming conventions as well as sample identification were consistent between the  
429 diverse data providers. The processed weekly dataset was appended to the historical dataset. For  
430 analysis purposes, this dataset was further enriched with the historical daily report of total of  
431 persons tested and number of positive cases by WWTP, as well as the daily and 14-day moving  
432 average positivity rate. Wastewater loads were calculated by multiplying the viral concentration  
433 data by the average influent flow rate in L/day. Measurements falling below the LOD provided  
434 by the respective lab where imputed based on a random selection between  $\frac{1}{2}$  of the LOD and the  
435 LOD. Wastewater viral load data was log transformed so results could be expressed as log<sub>10</sub>  
436 copies/day. Finally, data was aggregated by date and WWTP, to be used as input for the  
437 statistical analysis.

#### 438 Statistical methods and model

439 A multilevel regression model was fit to the wastewater viral load data in log<sub>10</sub> copies/day  
440 obtained from each lab. The base model included fixed effects for WWTP, lab, targets of N1 and  
441 N2, and a random effect to incorporate the three replicates of each combination.

442 To assess a one-week trend, a regression model using the current and previous week was used to  
443 calculate the week-to-week change for each WWTP (see **Fig 4B**). A multilevel model was used,  
444 which included an indicator variable representing week n-1 and week n interacted with the  
445 WWTP to assess the change, lab, targets of N1 and N2, and a random effect to incorporate the  
446 three replicates of each combination.

447 In addition to the weekly trend assessment, nonparametric regression methods were  
448 implemented to obtain the longitudinal profile for the measured viral load and clinical positivity  
449 rate for each WWTP and the city as a whole. A semi-parametric spline regression model was  
450 used to smooth the weekly aligned viral load in log<sub>10</sub> copies/day from each lab for each WWTP.  
451 The individual estimates for each WWTP were aggregated to obtain the longitudinal trend for the  
452 region. For the total viral load, the log<sub>10</sub> transformation was reversed for the smoothed trends of  
453 each WWTP, the estimates were summed and then the log<sub>10</sub> transformation was again applied.  
454 For the average trend across WWTP, the smoothed estimates were averaged. Variance estimates  
455 are obtained by summing the individual variances across WWTP, with an implicit assumption of  
456 little to no correlation across WWTP. Similarly, a semi-parametric spline regression model was  
457 used to smooth the clinical positivity rate for each WWTP, and the overall clinical positivity rate  
458 for the region.

459 Parametric and semi-parametric regression models were used to adjust for changes in  
460 methodologies within and between labs. The first transition involved the Baylor lab changing  
461 viral concentration methods from PEG precipitation to electronegative filtration (HA). Based on  
462 the head-to-head measurements of 15 wastewater samples, PEG measurements were adjusted to  
463 HA measurements. A simple linear regression model was fit to each of the N1 and N2 targets of  
464 the log<sub>10</sub> copies/L from HA, with the corresponding log<sub>10</sub> PEG copies/L as the predictor

465 variable. The N1 regression yielded an intercept of 3.24 ( $p=0.04$ ), slope of 0.81 ( $p<0.0001$ ) and  
466 adjusted R-squared of 0.678. The N2 regression yielded an intercept of 4.65 ( $p=0.07$ ), slope of  
467 0.67 ( $p=0.01$ ) and adjusted R-squared of 0.3419. Predicted values from these regression models  
468 formed the adjusted N1 and N2 copies from May 11 through June 29.

469 An alignment of measurements between Rice and Baylor was performed weekly, prior to  
470 obtaining the nonparametric longitudinal estimates. A semi-parametric regression model fitting  
471 Baylor N1 and N2 average log<sub>10</sub> copies/L with Rice N1 and N2 average log<sub>10</sub> copies/L is  
472 obtained. The model includes an indicator variable for a Rice nucleic acid extraction method  
473 change on August 24 times a natural spline with 8 degrees of freedom. The fitted model had an  
474 adjusted R-squared of 0.61 and improved each week as additional observations were used in the  
475 adjustment. Rice average N1 and N2 log<sub>10</sub> copies/L were adjusted to Baylor levels using the  
476 fitted regression model.

477 Since the methodology for longitudinal trends is based on splines, missing values may  
478 inappropriately impact the estimate. An additional data preparation step, was to linearly  
479 interpolate up to 2 missing values in the log<sub>10</sub> copies/day temporal series for each WWTP, as  
480 well as the positivity rate series when possible.

481 Spearman rank based correlation was obtained between the smoothed WWTP viral load  
482 estimates and the clinical positivity rate based on the estimates for Monday of each week of our  
483 study period. In addition, the Spearman correlation was obtained for the raw (unsmoothed)  
484 series. A cross-correlation analysis was performed using the smoothed wastewater viral load and  
485 smoothed positivity rate series. Spearman cross-correlations were computed with wastewater  
486 leading positivity rate between 0 and 14 days. On average, the cross-correlations were around 0.8

487 over the 14-day period, demonstrating that wastewater viral load estimates represent a leading  
488 indicator of clinical positivity rate.

489 Predictive models were explored for the clinical positivity rate based on the wastewater viral  
490 load for each WWTP service area. The predictive models used were regression models with  
491 different predictor variables derived from the longitudinal estimates of the wastewater viral load  
492 (in log<sub>10</sub> copies day<sup>-1</sup>) for each WWTP. The models were as follows:

493 *Model 1:* Indicator for WWTP, current, 1-week and 2-week lag of log<sub>10</sub> copies/day,

494 *Model 2:* Indicator for WWTP, 1-week and 2-week lag of log<sub>10</sub> copies/day

495 Each model incorporated the time series correlation structure through an autoregressive  
496 model of order 1 for the error process. The autoregressive parameter estimates were 0.516 and  
497 0.490 for Models 1 and 2, respectively.

498 The models were fit using generalized least squares to incorporate the autoregressive error  
499 structure, using R-function *gls* in the *nlme* package (29). In-sample comparisons demonstrated  
500 strong predictive ability; the Spearman correlation between predicted PR and smoothed PR is  
501 0.83 for model 1 and 0.79 for model 2. As expected, Model 1 is a stronger model since it used  
502 current wastewater values. To quantitatively assess the strength, we computed the Bayesian  
503 Information Criterion (BIC) for nested models. The model with the lowest BIC provides stronger  
504 characterization between wastewater viral loads and PR. The BIC for Model 1 = -75.08, while  
505 BIC Model 2 = 15.67, illustrating the greater explanatory power of Model 1. Summary model  
506 results are presented in **Table S3**.

507 In Models 1 and 2, the intercept represents the contribution from the WWTP 69<sup>th</sup> Street, the  
508 WWTP serving the largest percentage of the Houston population. For both fitted models, the

509 coefficients of the other 34 WWTP are significantly different from 0 ( $p < 0.001$ ) with the  
510 exception of Almeda Sims, Southwest, and Upper Brays Bayou, indicating these three WWTPs  
511 behaved similarly to the 69<sup>th</sup> Street WWTP.

512 Predicted positivity rates were obtained for each WWTP by evaluating Model 1 and Model 2  
513 at the smoothed estimates of wastewater viral load in log<sub>10</sub> copies/day. Time series plots for all  
514 WWTPs, are provided in **Figure S4**.

515

516 **Acknowledgments:** We thank Paul Zappi, Rae Mills, Carol LaBreche, Walid Samarneh, and  
517 Aisha Niang from Houston Water for their assistance in collecting wastewater samples. We  
518 thank Braulio Garcia, Courtney Hundley, Jeremy Rangel, Kelsey Caton, Rebeca Schneider,  
519 Daniel Bahrt, Kaavya Damakonda, Patrick Key, and Naomi Macias from the Houston Health  
520 Department for their assistance in sample collection and data analysis. We thank Jessica Chen,  
521 Kristina Cibor, Esther Lou, Basmah Maiga, Camille McCall, Dylan Nguyen, Pavan Raja, Kiara  
522 Reyes Gamas, Naomi Senehi, and Emma Zohner and for their assistance in sample collection,  
523 processing, analysis, and project management. We thank Jeseth Delgado Vela, Adam Smith,  
524 Nadine Kotlarz, Francis de los Reyes, and Angela Harris for their discussions on wastewater-  
525 based epidemiology.

526 **Funding:** This work was supported by the Houston Health Department and grants from the  
527 National Science Foundation (CBET 2029025) and seed funds from Rice University and Baylor  
528 College of Medicine. P.K. was funded by a Johnson & Johnson WiSTEM2D award. Z.W.L. was  
529 funded by an Environmental Research & Education Foundation scholarship and Rice University.  
530 P.A. was funded by a National Science Foundation award (CBET 1932000). T.C. was funded by  
531 the National Academies of Science, Engineering, and Medicine Gulf Research Early Career



532 Research Fellowship.

533 **Data and materials availability:** Data has been submitted for publication on the Kinder

534 Institute Urban Data Platform (<https://www.kinderudp.org/>). Once accepted, data will be issued a

535 DOI and data will be accessible following government procedures.

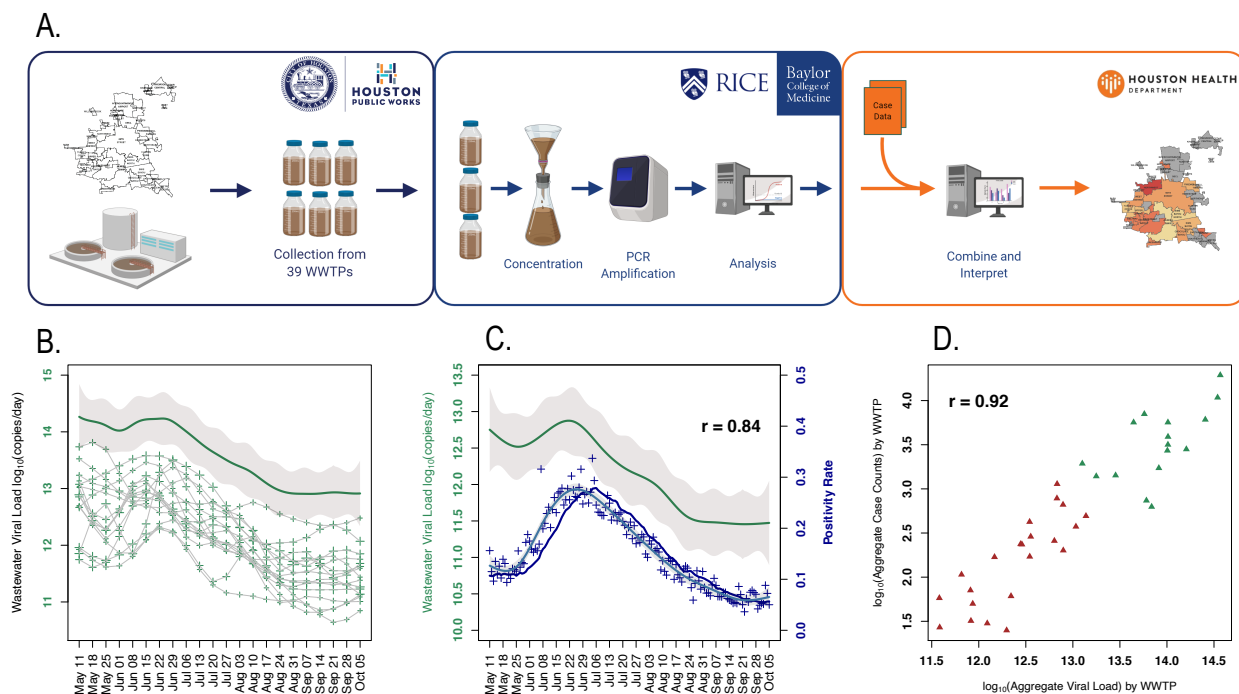

536 **Fig. 1. Wastewater monitoring in Houston shows that SARS-CoV-2 levels track positivity**  
 537 **rate.** (A) Overview of weekly SARS-CoV-2 wastewater surveillance system. (B) A nonlinear  
 538 regression (spline) was fit to the observations from each WWTP (+ symbols connected by lines  
 539 represent the same WWTP; the size of the + denotes the level of uncertainty). The individual  
 540 splines were inverse log<sub>10</sub> transformed, summed, and then log<sub>10</sub> transformed to form the  
 541 overall spline (green line). Grey line is the 95% confidence band for the overall estimate derived  
 542 from the sum of the variances (each spline). (C) Green line is the averaged spline for the  
 543 wastewater viral levels for the 16 WWTPs (from panel B). Dark blue line is the 14-day moving  
 544 average of the positivity rate (+ denoting the daily observations; the light blue line shows the  
 545 nonlinear regression (spline) fit to those observations). Grey represents the 95% confidence  
 546 bands. (D) Log<sub>10</sub> total positive clinical cases against log<sub>10</sub> total viral load over the study period.  
 547 Symbols denote individual WWTP's positive cases and total viral load. Green symbols denote  
 548 wastewater viral loads and cases (May 11 - October 5) and red symbols sites between July 8 and  
 549 October 5.

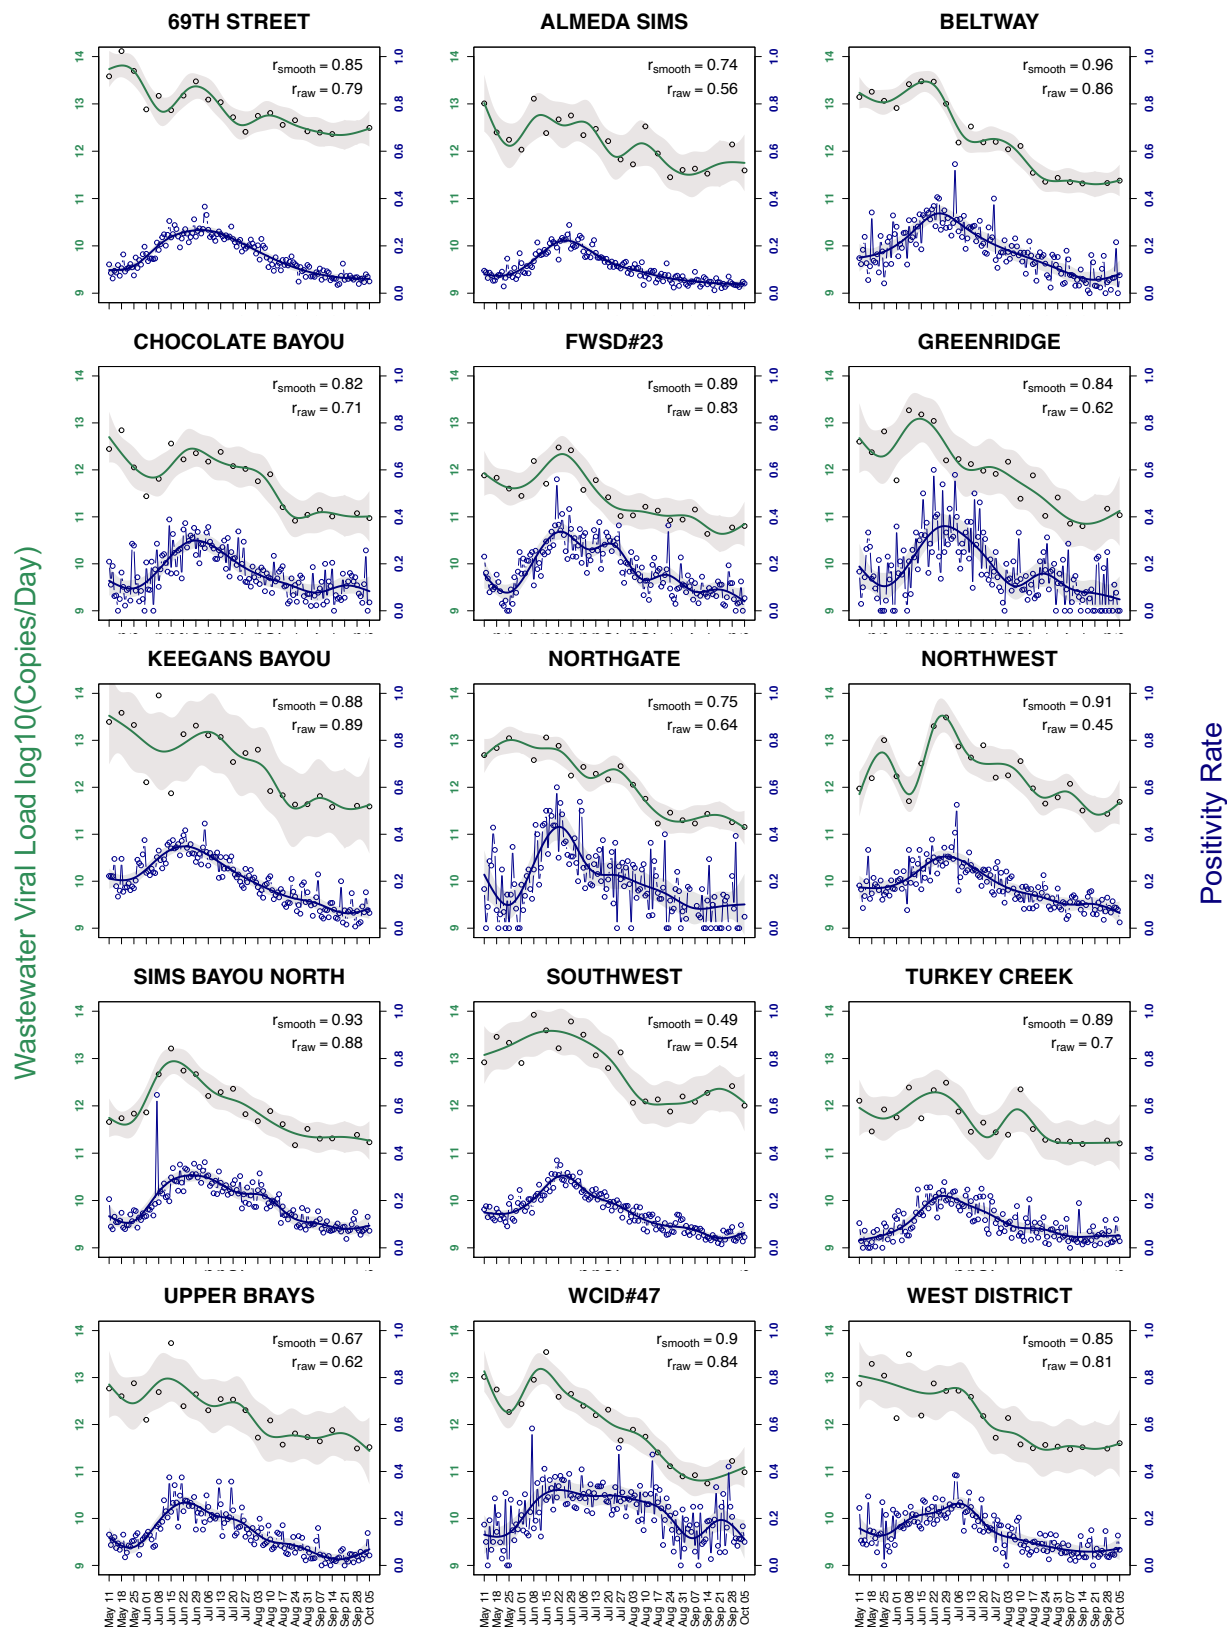

551 **Fig. 2. Wastewater viral loads and positivity rates for 15 individual WWTPs sampled**  
552 **between May 11 and October 5.** Individual observations for the wastewater viral load and  
553 positivity rate are denoted by  $\circ$  and green (wastewater) and blue (positivity rate) lines are the  
554 nonlinear regressions (splines) fit to the observations. Grey represents the 95% confidence bands.  
555  $r_{\text{smooth}}$  is the Spearman correlation estimate ( $r$ ) between the wastewater and positivity rate splines  
556 taken weekly, and  $r_{\text{raw}}$  is between the raw observations taken weekly on the dates with  
557 wastewater observations. A total of 16 WWTPs were sampled, but two WWTPs, Sims Bayou  
558 North and Sims Bayou South, have overlapping geographic service areas, so the wastewater data  
559 for both WWTPs was compared to clinical positivity rate data for the combined population  
560 served by the facilities and only Sims Bayou North is shown.  
561

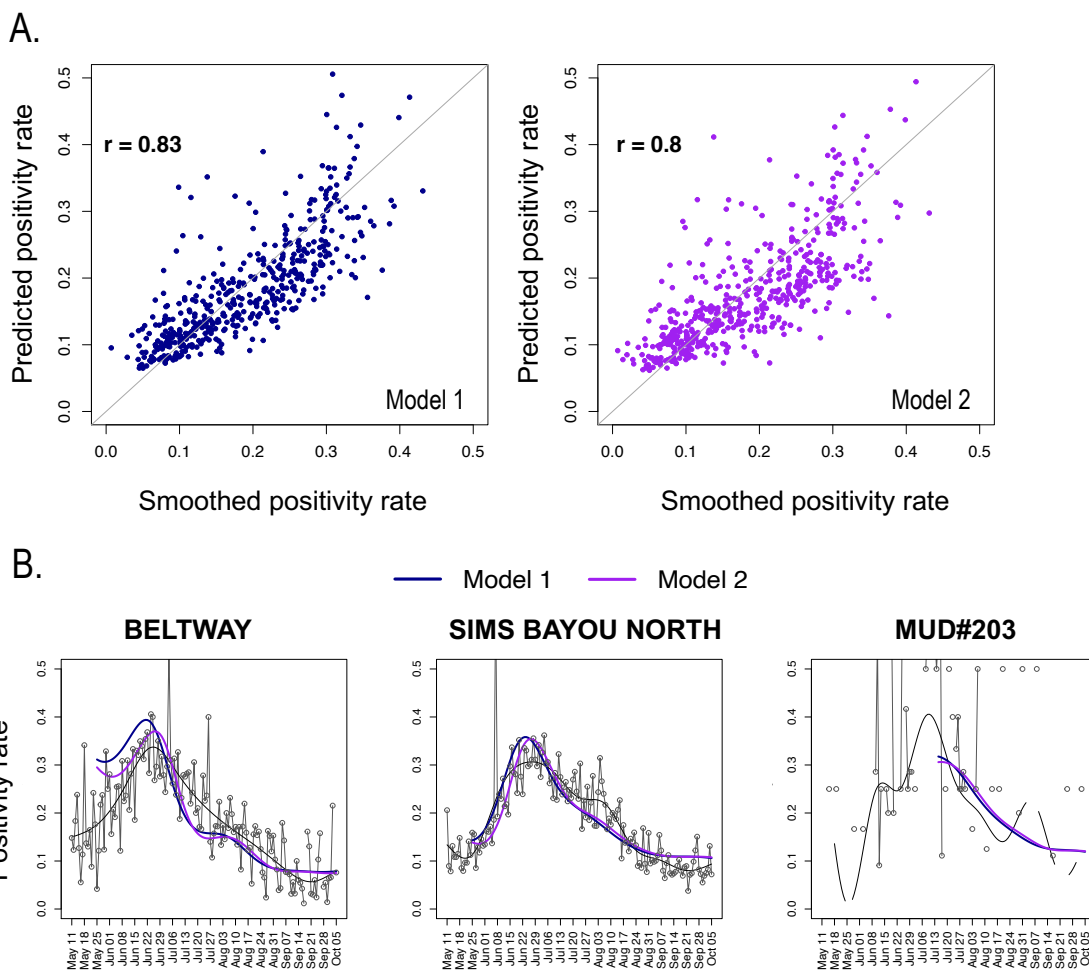

562

563 **Fig. 3. Wastewater viral loads predict positivity rates.** (A) Predictive Model 1 uses  
564 information about the WWTP and wastewater viral load data from the current week and two  
565 previous weeks to estimate the smoothed positivity rate for the WWTP service area. Model 2 is a  
566 true one-week predictive model and uses information about the WWTP and the two previous  
567 weeks of wastewater viral load data to predict the positivity rate for the service area. The plots  
568 show the predicted positivity rate versus the smoothed clinical positivity rate (Model 1:  
569 Spearman  $r = 0.83$ ; Model 2 Spearman  $r = 0.79$ ). Each dot represents a weekly positivity rate  
570 from an individual WWTP. WWTP positivity rate is considered missing, and excluded from the  
571 analysis, if 4 or fewer tests results are provided in a day. (B) Comparison of Model 1 (blue) and

572 2 (purple) predicted positivity rates and clinical positivity rates for three individual sewersheds  
573 over the study period. Daily clinical positivity rates are shown as grey circles and the smoothed  
574 positivity rate is represented by the grey line.

A.

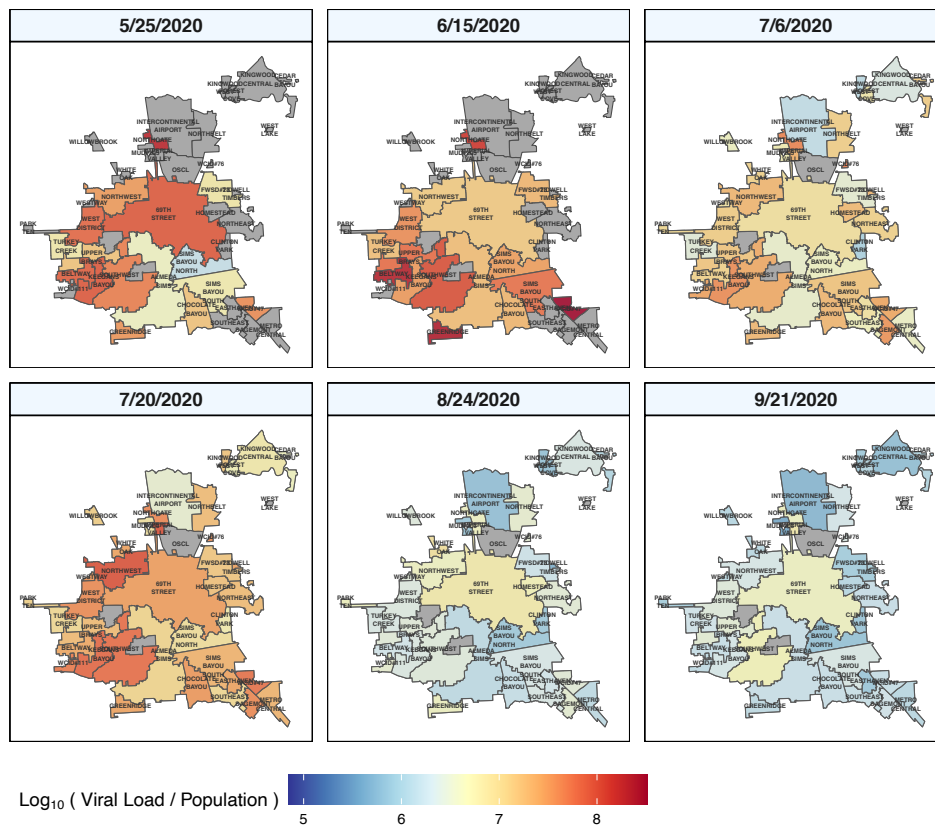

B.

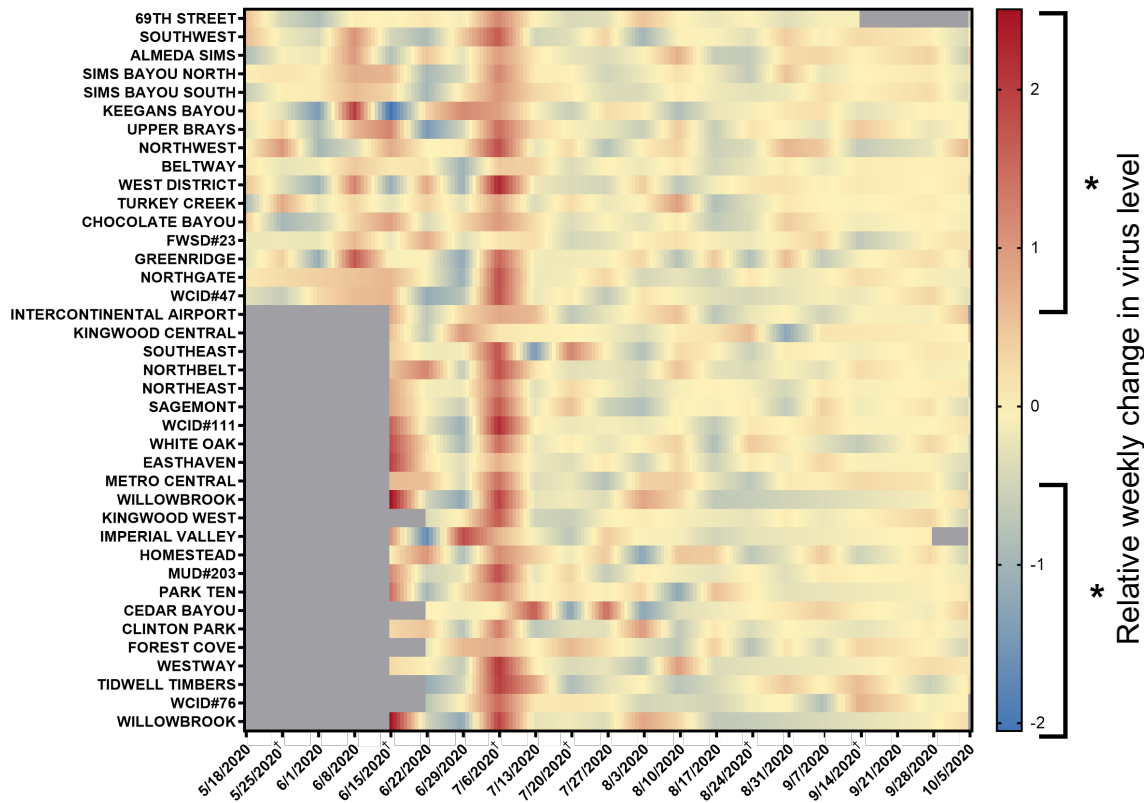

576 **Fig. 4. Identification of geographic areas of concern based on population normalized**  
577 **SARS-CoV-2 wastewater load ( $\log_{10}(\text{copies/person})$ ) and weekly change in viral load. (A)**  
578 WWTP service areas are outlined in black. Weekly viral loads were normalized by service  
579 population. Panels depict six time-points across the 22-week study period corresponding to  
580 before, during, and after the surge in positive cases in Houston. Grey areas indicate service areas  
581 that were not sampled or with missing data that week. (B) Heatmap of the direction, magnitude  
582 and significance of the one week change in  $\log_{10}(\text{virus copies/day})$ . A regression model was fit  
583 to measure the change from week (n-1) to week (n). Red colors indicate an increase in viral load  
584 since the previous week, while blue indicates a decrease. Grey areas indicate service areas that  
585 were not sampled or with missing data that week. The 16 WWTPs where sampling started in  
586 May are at the top of the heatmap ordered by size of population serviced. Remaining WWTPs  
587 follow, again ordered by size of population serviced. Brackets labeled with \* on the scale  
588 represent values where at least 95% of the trend coefficients had a p-value  $< 0.05$ . Dates shown  
589 in panel A are denoted with †.  
590



591 **References**

- 592 1. G. Medema, F. Been, L. Heijnen, S. Petterson, Implementation of environmental  
593 surveillance for SARS-CoV-2 virus to support public health decisions: Opportunities and  
594 challenges. *Curr. Opin. Environ. Sci. Heal.* **17**, 49–71 (2020).
- 595 2. S. Mallapaty, How sewage could reveal true scale of coronavirus outbreak. *Nature.* **580**,  
596 176–177 (2020).
- 597 3. S. Parasa, M. Desai, V. Thoguluva Chandrasekar, H. K. Patel, K. F. Kennedy, T. Roesch,  
598 M. Spadaccini, M. Colombo, R. Gabbiadini, E. L. A. Artifon, A. Repici, P. Sharma,  
599 Prevalence of Gastrointestinal Symptoms and Fecal Viral Shedding in Patients With  
600 Coronavirus Disease 2019: A Systematic Review and Meta-analysis. *JAMA Netw. Open.*  
601 **3**, e2011335–e2011335 (2020).
- 602 4. M. L. Holshue, C. DeBolt, S. Lindquist, K. H. Lofy, J. Wiesman, H. Bruce, C. Spitters, K.  
603 Ericson, S. Wilkerson, A. Tural, First case of 2019 novel coronavirus in the United States.  
604 *N. Engl. J. Med.* **382**, 929–936 (2020).
- 605 5. M. M. Lamers, J. Beumer, J. van der Vaart, K. Knoops, J. Puschhof, T. I. Breugem, R. B.  
606 G. Ravelli, J. Paul van Schayck, A. Z. Mykytyn, H. Q. Duimel, E. van Donselaar, S.  
607 Riesebosch, H. J. H. Kuijpers, D. Schipper, W. J. van de Wetering, M. de Graaf, M.  
608 Koopmans, E. Cuppen, P. J. Peters, B. L. Haagmans, H. Clevers, SARS-CoV-2  
609 productively infects human gut enterocytes. *Science (80-. ).* **369**, 50–54 (2020).
- 610 6. G. Medema, L. Heijnen, G. Elsinga, R. Italiaander, A. Brouwer, Presence of SARS-  
611 Coronavirus-2 RNA in Sewage and Correlation with Reported COVID-19 Prevalence in  
612 the Early Stage of the Epidemic in The Netherlands. *Environ. Sci. Technol. Lett.* **7**, 511–  
613 516 (2020).

- 614 7. W. Randazzo, P. Truchado, E. Cuevas-Ferrando, P. Simón, A. Allende, G. Sánchez,  
615 SARS-CoV-2 RNA in wastewater anticipated COVID-19 occurrence in a low prevalence  
616 area. *Water Res.* **181**, 115942 (2020).
- 617 8. W. Ahmed, N. Angel, J. Edson, K. Bibby, A. Bivins, J. W. O'Brien, P. M. Choi, M.  
618 Kitajima, S. L. Simpson, J. Li, First confirmed detection of SARS-CoV-2 in untreated  
619 wastewater in Australia: A proof of concept for the wastewater surveillance of COVID-19  
620 in the community. *Sci. Total Environ.* **728**, 138764 (2020).
- 621 9. S. P. Sherchan, S. Shahin, L. M. Ward, S. Tandukar, T. G. Aw, B. Schmitz, W. Ahmed,  
622 M. Kitajima, First detection of SARS-CoV-2 RNA in wastewater in North America: A  
623 study in Louisiana, USA. *Sci. Total Environ.* **743**, 140621 (2020).
- 624 10. G. La Rosa, M. Iaconelli, P. Mancini, G. Bonanno Ferraro, C. Veneri, L. Bonadonna, L.  
625 Lucentini, E. Suffredini, First detection of SARS-CoV-2 in untreated wastewaters in Italy.  
626 *Sci. Total Environ.* **736**, 139652 (2020).
- 627 11. E. Haramoto, B. Malla, O. Thakali, M. Kitajima, First environmental surveillance for the  
628 presence of SARS-CoV-2 RNA in wastewater and river water in Japan. *Sci. Total*  
629 *Environ.* **737**, 140405 (2020).
- 630 12. T. Prado, T. M. Fumian, C. F. Mannarino, A. G. Maranhão, M. M. Siqueira, M. P.  
631 Miagostovich, Preliminary results of SARS-CoV-2 detection in sewerage system in  
632 Niterói municipality, Rio de Janeiro, Brazil. *Mem. Inst. Oswaldo Cruz.* **115**, e200196–  
633 e200196 (2020).
- 634 13. M. Kumar, A. K. Patel, A. V Shah, J. Raval, N. Rajpara, M. Joshi, C. G. Joshi, First proof  
635 of the capability of wastewater surveillance for COVID-19 in India through detection of  
636 genetic material of SARS-CoV-2. *Sci. Total Environ.* **746**, 141326 (2020).

- 637 14. A. Nemudryi, A. Nemudraia, T. Wiegand, K. Surya, M. Buyukyoruk, K. K. Vanderwood,  
638 R. Wilkinson, B. Wiedenheft, *medRxiv Prepr. Serv. Heal. Sci.*, in press,  
639 doi:10.1101/2020.04.15.20066746.
- 640 15. F. Wu, A. Xiao, J. Zhang, X. Gu, W. L. Lee, K. Kauffman, W. Hanage, M. Matus, N.  
641 Ghaeli, N. Endo, C. Duvallet, K. Moniz, T. Erickson, P. Chai, J. Thompson, E. Alm,  
642 SARS-CoV-2 titers in wastewater are higher than expected from clinically confirmed  
643 cases. *mSystems*. **5**, e00614-20 (2020).
- 644 16. J. Peccia, A. Zulli, D. E. Brackney, N. D. Grubaugh, E. H. Kaplan, A. Casanovas-  
645 Massana, A. I. Ko, A. A. Malik, D. Wang, M. Wang, J. L. Warren, D. M. Weinberger, W.  
646 Arnold, S. B. Omer, Measurement of SARS-CoV-2 RNA in wastewater tracks community  
647 infection dynamics. *Nat. Biotechnol.* (2020), doi:10.1038/s41587-020-0684-z.
- 648 17. R. Li, S. Pei, B. Chen, Y. Song, T. Zhang, W. Yang, J. Shaman, *Science (80- )*, in press,  
649 doi:10.1126/science.abb3221.
- 650 18. A. Weiss, M. Jellingsø, M. O. A. Sommer, Spatial and temporal dynamics of SARS-CoV-  
651 2 in COVID-19 patients: A systematic review and meta-analysis. *EBioMedicine*. **58**,  
652 102916 (2020).
- 653 19. Y. Chen, L. Chen, Q. Deng, G. Zhang, K. Wu, L. Ni, Y. Yang, B. Liu, W. Wang, C. Wei,  
654 J. Yang, G. Ye, Z. Cheng, The presence of SARS-CoV-2 RNA in the feces of COVID-19  
655 patients. *J. Med. Virol.* **92**, 833–840 (2020).
- 656 20. G. La Rosa, P. Mancini, G. Bonanno Ferraro, C. Veneri, M. Iaconelli, L. Bonadonna, L.  
657 Lucentini, E. Suffredini, SARS-CoV-2 has been circulating in northern Italy since  
658 December 2019: Evidence from environmental monitoring. *Sci. Total Environ.* **750**,  
659 141711 (2021).

- 660 21. A. U. Jorgensen, J. Gamst, L. V. Hansen, I. I. H. Knudsen, S. K. S. Jensen, *medRxiv*, in  
661 press, doi:10.1101/2020.07.10.20150573.
- 662 22. K. Graham, S. Loeb, M. Wolfe, D. Catoe, N. Sinnott-Armstrong, S. Kim, K. Yamahara, L.  
663 Sassoubre, L. Mendoza, L. Roldan-Hernandez, L. Li, K. Wigginton, A. Boehm, *medRxiv*,  
664 in press, doi:10.1101/2020.09.14.20194472.
- 665 23. Y. Berchenko, Y. Manor, L. S. Freedman, E. Kaliner, I. Grotto, E. Mendelson, A.  
666 Huppert, Estimation of polio infection prevalence from environmental surveillance data.  
667 *Sci. Transl. Med.* **9**, eaaf6786 (2017).
- 668 24. P. M. Gundy, C. P. Gerba, I. L. Pepper, Survival of Coronaviruses in Water and  
669 Wastewater. *Food Environ. Virol.* **1**, 10 (2008).
- 670 25. W. Ahmed, V. J. Harwood, P. Gyawali, J. P. S. Sidhu, S. Toze, *Appl. Environ. Microbiol.*,  
671 in press, doi:10.1128/AEM.03851-14.
- 672 26. Y. Ye, R. M. Ellenberg, K. E. Graham, K. R. Wigginton, Survivability, Partitioning, and  
673 Recovery of Enveloped Viruses in Untreated Municipal Wastewater. *Environ. Sci.*  
674 *Technol.* **50**, 5077–5085 (2016).
- 675 27. T. Worley-Morse, M. Mann, W. Khunjar, L. Olabode, R. Gonzalez, Evaluating the fate of  
676 bacterial indicators, viral indicators, and viruses in water resource recovery facilities.  
677 *Water Environ. Res.* **91**, 830–842 (2019).
- 678 28. CDC, “CDC 2019–Novel Coronavirus (2019-nCoV), Real-Time RT-PCR Diagnostic  
679 Panel, For Emergency Use Only” (2020), (available at  
680 <https://www.fda.gov/media/134922/download>).
- 681 29. J. Pinheiro, D. Bates, S. DebRoy, D. Sarkar, S. Heisterkamp, B. Van Willigen, R.  
682 Maintainer, Package ‘nlme.’ *Linear nonlinear Mix. Eff. Model. version.* **3** (2017).
